# Supplementary material for: PRECIOUS study (PREterm Caesarean/vaginal birth and IVH/OUtcomeS): does mode of birth reduce the risk of death or brain injury in very preterm babies? A cohort and emulated target trial protocol
Source: PubMed Central journal article supplement — BMJ Open. 2024 Sep 10;14(9):e089722. doi: 10.1136/bmjopen-2024-089722 (PMC11409379; doi:10.1136/bmjopen-2024-089722), 2024-09-10
Supplement: bmjopen-2024-089722.reviewer_comments.pdf [file bmjopen-2024-089722.reviewer_comments.pdf]

## PEER REVIEW HISTORY

BMJ Open publishes all reviews undertaken for accepted manuscripts. Reviewers are asked to complete a checklist review form (<http://bmjopen.bmj.com/site/about/resources/checklist.pdf>) and are provided with free text boxes to elaborate on their assessment. These free text comments are reproduced below.

## ARTICLE DETAILS

|                            |                                                                                                                                                                                                  |
|----------------------------|--------------------------------------------------------------------------------------------------------------------------------------------------------------------------------------------------|
| <b>TITLE (PROVISIONAL)</b> | PRECIOUS STUDY (PRETERM CAESAREAN/VAGINAL BIRTH & IVH/OUTCOMES): DOES MODE OF BIRTH REDUCE THE RISK OF DEATH OR BRAIN INJURY IN VERY PRETERM BABIES? A COHORT AND EMULATED TARGET TRIAL PROTOCOL |
| <b>AUTHORS</b>             | Odd, David; Reeve, Nicola F; Barnett, Jane; Cutter, Judith; Daniel, Rhian; Gale, Chris; Siasakos, Dimitris                                                                                       |

This article was not externally reviewed at BMJ Open. Protocols that have been independently assessed prior to submission to BMJ Open are usually fast-tracked to publication on the grounds that further substantial changes will not be possible. This independent assessment will usually be external, independent review for both a substantial grant award from a non-commercial or government funder and ethics approval.
